# Supplementary material for: Effects of Operating Parameters and Feed Gas Compositions on the Dry Reforming of Methane over the Ni/Al2O3 Catalyst
Source: MDPI journal article supplement (doi:10.3390/catal13030602), 2023-03-16
Supplement: s1 [file s1]

Supplementary information

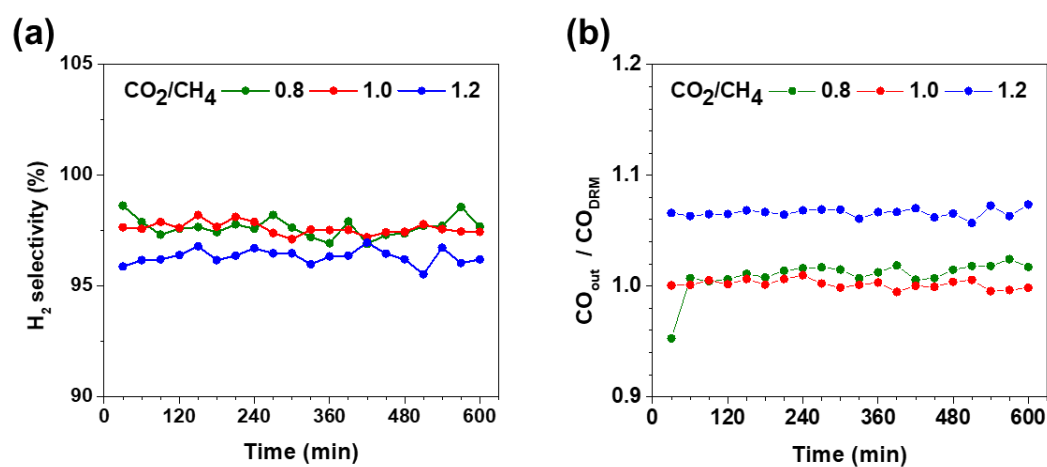

**Figure S1.** Time on stream results of dry reforming reaction with Ni/Al<sub>2</sub>O<sub>3</sub> catalyst: (a) H<sub>2</sub> selectivity, (b) CO<sub>out</sub>/CO<sub>DRM</sub> ratio ; T = 850 °C, WHSV = 60 L/g·h<sup>-1</sup>.

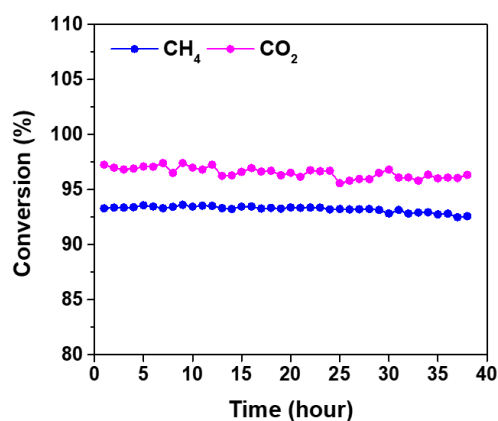

**Figure S2.** Time on stream results of dry reforming reaction over Ni/Al<sub>2</sub>O<sub>3</sub> catalyst; T = 850 °C, WHSV = 60 L/g·h<sup>-1</sup>, CH<sub>4</sub>:CO<sub>2</sub>:N<sub>2</sub> = 3:3:4.

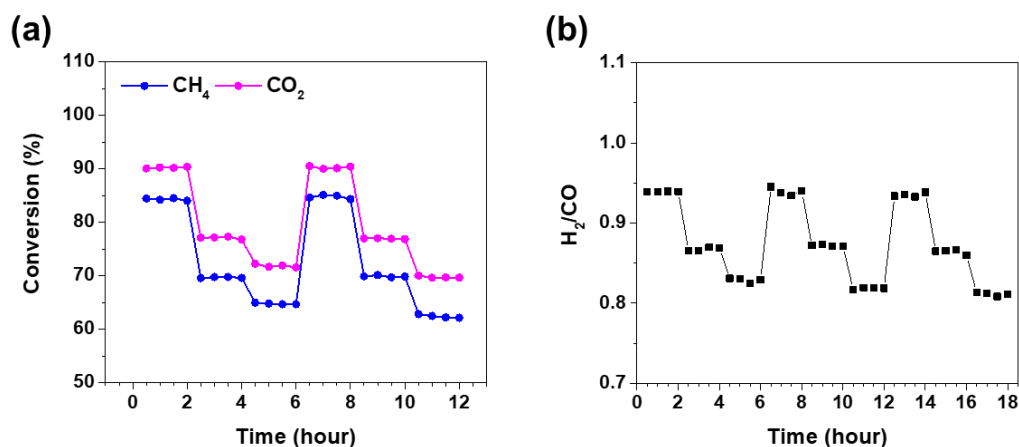

**Figure S3.** Time on stream results of dry reforming reaction over Ni/Al<sub>2</sub>O<sub>3</sub> catalyst with different WHSV of 60, 120, 180 L/g·h<sup>-1</sup>: (a) Conversion of CH<sub>4</sub> and CO<sub>2</sub>, (b) H<sub>2</sub>/CO ratio; T = 800 °C, CH<sub>4</sub>:CO<sub>2</sub>:N<sub>2</sub> = 3:3:4.

**Table S1.** Comparative research on dry reforming of methane over Ni/Al<sub>2</sub>O<sub>3</sub> catalyst.

| Catalyst                                        | Reaction temperature | Space velocity (GHSV)                  | Feed composition                                                               | CH <sub>4</sub> conversion | H <sub>2</sub> /CO | Stability test | Ref.             |
|-------------------------------------------------|----------------------|----------------------------------------|--------------------------------------------------------------------------------|----------------------------|--------------------|----------------|------------------|
| 10 wt% Ni/Al <sub>2</sub> O <sub>3</sub> (WI)   | 850 °C               | 60 L·g <sup>-1</sup> ·h <sup>-1</sup>  | CH <sub>4</sub> :CO <sub>2</sub> :N <sub>2</sub> = 3:3:4 (Total= 50mL/min)     | 93%                        | 0.97               | 38 h           | In this research |
| 10.5 wt% Ni/Al <sub>2</sub> O <sub>3</sub> (WI) | 800 °C               | 60 L·g <sup>-1</sup> ·h <sup>-1</sup>  | CH <sub>4</sub> :CO <sub>2</sub> :N <sub>2</sub> = 7.5:7.5:5 (Total= 20mL/min) | 85%                        | 0.88               | 66 h           | [44]             |
| 10 wt% Ni/Al <sub>2</sub> O <sub>3</sub> (WI)   | 700 °C               | 24 L·g <sup>-1</sup> ·h <sup>-1</sup>  | CH <sub>4</sub> :CO <sub>2</sub> :N <sub>2</sub> = 1:1:3 (Total= 12mL/min)     | ~82%                       | -                  | 200 h          | [29]             |
| 5 wt% Ni/Al <sub>2</sub> O <sub>3</sub> (WI)    | 700 °C               | 120 L·g <sup>-1</sup> ·h <sup>-1</sup> | CH <sub>4</sub> :CO <sub>2</sub> :N <sub>2</sub> = 1:1:2 (Total= 60mL/min)     | ~76%                       | 0.85               | 20 h           | [19]             |
